# Supplementary material
Source: publisher site journal article supplement (https://www.dovepress.com/article/349251)
Supplement: Supplementary file 1 [file get_supplementary_file.php]

**Supplementary Materials**

**Table S1.** Basic descriptive statistics of study variables by gender

| Variables | Gender | N | X±SE | 95% CI | P |
| --- | --- | --- | --- | --- | --- |
| Age (y) | Males | 489 | 42.80±0.62 | (41.58, 44.05) | 0.651 |
|  | Females | 589 | 43.20±0.56 | (42.09, 44.31) |  |
| BMI (kg/m2) | Males | 487 | 27.55**±**0.19 | (27.15, 27.92) | <0.001 |
| Females | 589 | 28.72±0.24 | (28.23, 29.21) |  |
| WHR | Males | 484 | 0.92±0.003 | (0.92, 0.93) | <0.001 |
| Females | 583 | 0.88±0.004 | (0.87, 0.89) |  |
| FM/W | Males | 481 | 0.25±0.002 | (0.25, 0.26) | <0.001 |
|  | Females | 575 | 0.36±0.003 | (0.36, 0.37) |  |
| SMM/W | Males | 478 | 0.37 ± 0.002 | (0.37, 0.38) | <0.001 |
|  | Females | 573 | 0.27 ± 0.001 | (0.27,0.28) |  |
| ECW (L) | Males | 483 | 20.75±0.15 | (20.46, 21.05) | <0.001 |
|  | Females | 576 | 16.53±0.10 | (16.32, 16.74) |  |
| ICW(L) | Males | 483 | 24.52±3.77 | (24.18, 24.85) | <0.001 |
|  | Females | 576 | 16.90±2.49 | (16.70, 17.10) |  |
| GDF-15 (pg/ml) | Males | 455 | 519.81±14.72 | (490.87, 548.75) | 0.001* |
|  | Females | 540 | 481.03±19.43 | (422.85, 519.20) |  |
| Follistatin (pg/ml) | Males | 451 | 556.9±18.09 | (512.54, 592.65) | 0.266* |
|  | Females | 531 | 528.5±17.93 | (493.34, 563.79) |  |
| Vaspin (pg/ml) | Males | 458 | 1603.59 ± 233.68 | (1144.35, 2062.82) | 0.001* |
|  | Females | 547 | 1605.21 ± 210.53 | 1191.68, 2018.79) |  |

Data are presented as mean ± standard errors; N, sample size. P values were determined by one way ANOVA. *these variables were compared also by Man-Whitney test. Variable definitions are given in the Material and Methods section.

**Table S2**. Body composition parameters in individuals with LBP compared with the control subjects.

|  | Control  N=520 | LBP-affected  N=558 | ANOVA  *p*-value | ANCOVA *p*-value |
| --- | --- | --- | --- | --- |
| Age | 39.49±0.59 | 46.32±0.55 | <0.00001 |  |
| LBP disability scores | 3.82±0.09 | 15.89±0.30 | 0.0001 | 0.001 |
| BMI | 27.33±0.23 | 28.980.22 | <0.00001 | NS |
| WHR | 0.89±0.003 | 0.91±0.003 | <0.00001 | 0.01 |
| FM/W | 0.30±0.003 | 0.33±0.003 | <0.00001 | NS |
| SMM/W | 0.33±0.002 | 0.31±0.002 | <0.00001 | NS |
| ICW | 20.74±0.22 | 20.03±0.20 | 0.01 | NS |
| ECW | 18.03±0.15 | 18.86±0.15 | 0.0001 | 0.00003 |
| GDF-15 | 1.78±0.003 | 1.81±0.003 | <0.0001 | 0.01 |
| Follistatin | 5.87±0.04 | 6.10±0.04 | 0.0003 | 0.04 |
| Vaspin | 5.83±0.04 | 6.12±0.06 | 0.0001 | 0.001 |

Data are presented as mean ± standard errors; N, sample size; LBP-disability scores based on Roland-Morris Low Back Pain and Disability Questionnaire (RMDQ); BMI, body mass index; WHR, waist-to-hip ratio; FM/W, fat mass/weight ratio; SMM/W, skeletal muscle mass/weight ratio; ICW, intracellular water; ECW, extracellular water; GDF-15, Growth and differentiation factor 15.

Significance levels from comparison of control individuals with LBP-affected subjects with ANOVA (and ANCOVA, when including age and sex), are presented. NS, non-significant.

**Table S3.** Pearson correlations between body composition parameters and plasma levels of soluble markers in the study sample, in men

and women separately; male correlations are shown above the diagonal and female below.

|  | AGE | BMI | WHR | FM/W | SMM/W | ICW | ECW | GDF-15 | Follistatin | Vaspin |
| --- | --- | --- | --- | --- | --- | --- | --- | --- | --- | --- |
| AGE |  | 0.272 | 0.572 | 0.302 | -0.462 | -0.282 | 0.322 | 0.532 | 0.142 | 0.07n |
| BMI | 0.612 |  | 0.552 | 0.792 | -0.782 | 0.552 | 0.582 | 0.212 | 0.132 | 0.121 |
| WHR | 0.472 | 0.422 |  | 0.532 | -0.592 | 0.07n | 0.452 | 0.332 | 0.142 | 0.03n |
| FM/W | 0.532 | 0.872 | 0.402 |  | -0.962 | 0.192 | 0.492 | 0.272 | 0.08n | 0.07n |
| SMM/W | -0.662 | -0.812 | -0.432 | -0.952 |  | -0.192 | -0.432 | -0.342 | -0.111 | -0.07n |
| ICW | 0.162 | 0.542 | 0.152 | 0.292 | -0.212 |  | 0.322 | -0.142 | 0.04n | 0.04n |
| ECW | 0.462 | 0.672 | 0.272 | 0.632 | -0.462 | 0.232 |  | 0.262 | 0.07n | 0.152 |
| GDF-15 | 0.582 | 0.432 | 0.362 | 0.392 | -0.442 | 0.132 | 0.362 |  | 0.121 | 0.04n |
| Follistatin | 0.322 | 0.272 | 0.122 | 0.232 | -0.282 | 0.06n | 0.182 | 0.302 |  | 0.02n |
| Vaspin | 0.04n | 0.06n | 0.01n | 0.03n | -0.01n | 0.06n | 0.06n | 0.00n | 0.01n |  |

BMI, body mass index; WHR, waist-to-hip ratio; FM/W, fat mass/weight ratio; SMM/W, skeletal muscle mass/weight ratio; ICW, intracellular water; ECW, extracellular water; GDF-15, Growth and differentiation factor 15, 1*p* <.05; 2*p* <.01; nnon-significant.

**Table S4.** Mixed-model regression analysis exploring relationships between covariates and LBP disability.

| Dependent variable: LBP disability | | | | |
| --- | --- | --- | --- | --- |
| **Independent** | **Beta** | **SE** | **T** | **p-value** |
| Age | 0.157 | 0.030 | 5.170 | 2.65×10-7 |
| Sex | 0.131 | 0.027 | 4.717 | 0.000003 |
| ECW | 0.096 | 0.029 | 3.210 | 0.001 |
| WHR | 0.076 | 0.028 | 2.710 | 0.006 |
| GDF-15 | 0.172 | 0.028 | 6.095 | 1.38×10-9 |
| Vaspin | 0.082 | 0.023 | 3.510 | 0.0004 |
| Follistatin | 0.078 | 0.024 | 3.227 | 0.001 |
| Mental disorders | 0.082 | 0.023 | 3.470 | 0.0005 |
| Model summary: R2= 0.1708 | | | | |

SE, standard error; ECW, extracellular water; WHR, waist-to-hip ratio; GDF-15, Growth and differentiation factor 15; all quantitative variables were standardized prior to statistical analysis.
